# Supplementary material for: The effect of adding Bi3+ on the performance of a newly developed iron–copper redox flow battery
Source: Royal Society of Chemistry journal article supplement (doi:10.1039/c7ra12926b), 2018-01-01
Supplement: c7ra12926b1.pdf [file c7ra12926b1.pdf]

**Supporting Information**

**The effect of adding Bi<sup>3+</sup> on the performance of a newly developed iron-copper redox flow battery**

Daniel Manaye Kabtamu,<sup>1</sup> Guan-Yi Lin,<sup>1</sup> Yu-Chung Chang,<sup>1</sup> Huseh-Yu Chen,<sup>1</sup> Hsin-Chih Huang,<sup>1</sup> Ning-Yih Hsu,<sup>2</sup> Yi-Sin Chou,<sup>2</sup> Hwa-Jou Wei,<sup>2</sup> Chen-Hao Wang\*<sup>1</sup>

<sup>1</sup>*Department of Materials Science and Engineering, National Taiwan University of Science and Technology, 10607, Taipei, Taiwan.*

<sup>2</sup>*Institute of Nuclear Energy Research, Atomic Energy Council, Executive Yuan, 32546, Taoyuan, Taiwan.*

\*Corresponding author, E-mail: [chwang@mail.ntust.edu.tw](mailto:chwang@mail.ntust.edu.tw)

Tel: +886-2-2730-3715; Fax: +886-2-2737-6544

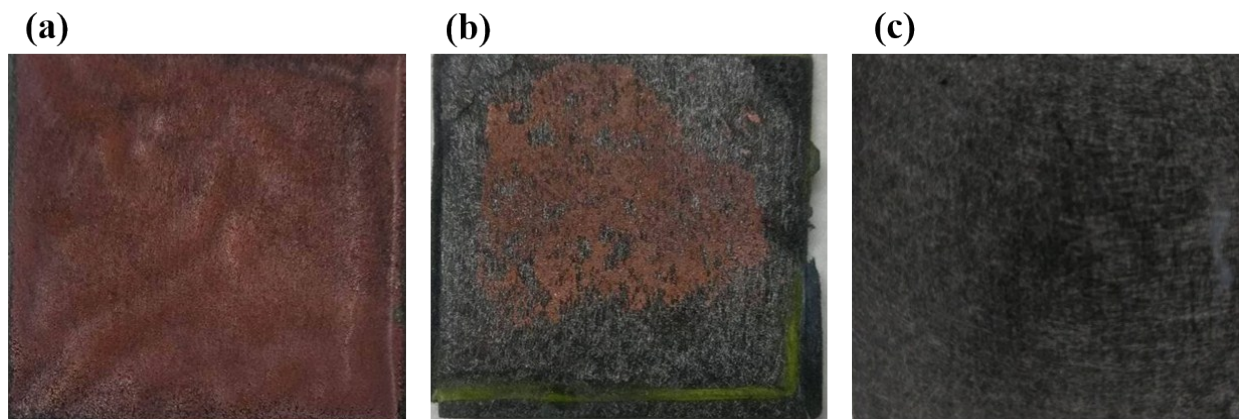

**Fig. S1.** Photographs of (a) HT-GF, (b) HT-GF+ HT-CP without  $\text{Bi}^{3+}$ , and (c) HT-GF + HT-CP with 0.01 M  $\text{Bi}^{3+}$  after charge-discharge cycling measurements.

To make sure the reaction which is proceed in the negative electrode (cathode side), we studied the property of  $\text{CuCl}$ , which is difficult to dissolve in water. When the  $\text{Cu}^+$  ion is added into water, it forms  $\text{CuCl(s)}$  precipitation. Based on this property of  $\text{CuCl}$ , we set 5 stages for the charge-discharge test, which shows in **Fig. S2**. At each stage, we took 5 ml of anolyte and then added 20 ml DI water to observe the change of precipitation. The results from each stage refer to **Fig. S3 and S4**. From stage 1 to stage 2, there is a little decrease of  $\text{CuCl}$  precipitation (white), which is due to the reduction of  $\text{Cu}^+$  to  $\text{Cu(s)}$ . From stage 2 to stage 3, no precipitation is observed because of the  $\text{Cu}^+$  ion is totally transformed into  $\text{Cu}$  metal. From stage 3 to stage 4, there is some  $\text{CuCl}$  participation occurred owing to  $\text{Cu}$  metal started to become  $\text{Cu}^+$ . From stage 4 to stage 5, more precipitation is observed because of larger amount of  $\text{Cu(s)}$  becomes  $\text{Cu}^+$ . From the above explanation, we conclude that the redox reaction is takes place between  $\text{Cu(s)}$  and  $\text{Cu}^+$ .

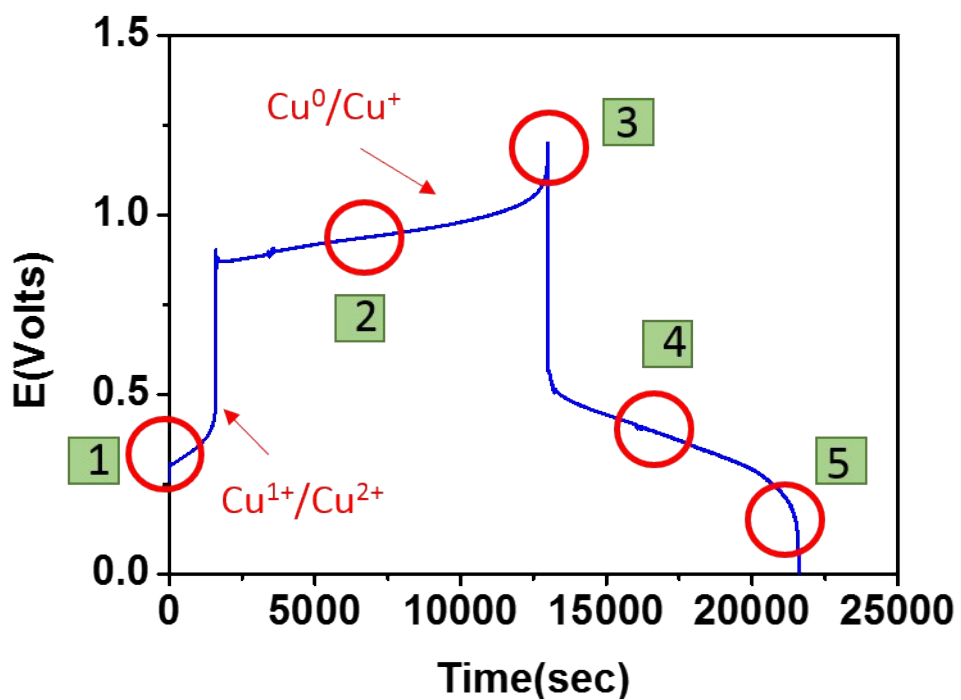

Fig. S2..The 5 stages of the charge-discharge curve.

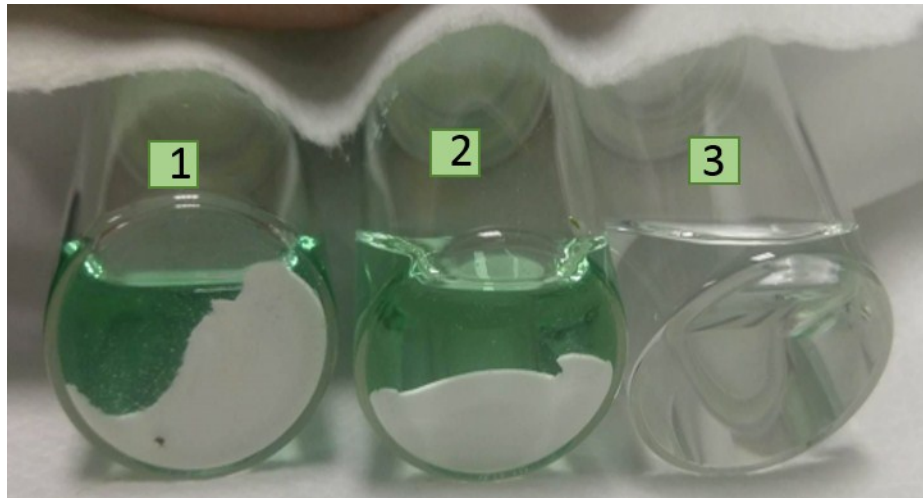

Fig. S3. The result of the stage 1, 2 & 3 of the charge-discharge curve.

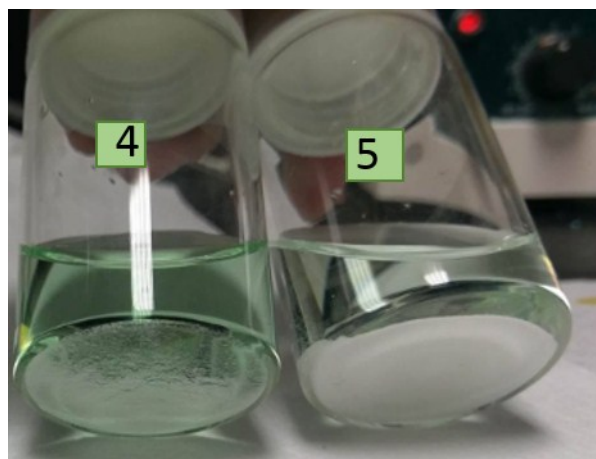

**Fig. S4.** The result of the stage 4 &5 of the charge-discharge curve.
